# Supplementary material
Source: publisher site journal article supplement (https://www.dovepress.com/article/362510)
Supplement: Supplementary file 1 [file get_supplementary_file.php]

**Supplementary data**

[Full search string for literature search 2](#_Toc100576736)

[Studies selected from the literature search 3](#_Toc100576737)

[Final version of the “Brief Five-item Chronic Pain Questionnaire” in the original language 23](#_Toc100576738)

[Final version of the “Brief Five-item Chronic Pain Questionnaire” in English 24](#_Toc100576739)

# Full search string for literature search

*(questionnaire* [ti] OR &quot;feedback form&quot; [tiab] OR &quot;inquiry form&quot; [tiab] OR Humans surveys and questionnaires [mh:noexp] OR &quot;response technique&quot; [tiab] OR healthcare surveys [majr] OR health surveys [mh:noexp] OR behavioral risk factor surveillance system [majr] OR health status indicator [majr] OR self report [major] OR data collection [mh:noexp]) AND ((chronic pain/di [majr] OR chronic pain/ep [majr]) OR (&quot;long lasting&quot; [ti] OR constant [ti] OR continuing [ti] OR incessant [ti] OR incessantly [ti] OR persistent [ti] OR steady [ti] OR unceasing [ti] OR unremitting [ti] OR un remitted [ti] OR chronic [ti] OR chronically [ti] OR restless [ti] OR continual [ti] OR continuous [ti] OR incurable [ti] OR lifelong [ti] OR lingering [ti] OR ceaseless [ti] OR enduring [ti] OR ineradicable [ti] OR lasting [ti] OR &quot;long lasting&quot; [ti] OR &quot;ever present&quot; [ti] OR obstinate [ti] OR prolonged [ti] OR stubborn [ti] OR tenacious [ti]) AND (pain/di [majr] OR pain/ep [majr]))*

# Studies selected from the literature search

| Studies in descending order of publication | CP dimensions investigated by “5-Item CP Quest” | How these dimensions were investigated by each study | Presence of a validation procedure for the measures used |
| --- | --- | --- | --- |
| 1. Yongjun et al., 2020 | CP occurrence | ND | No |
| CP intensity | NI |
| CP causes | NI |
| Use of drugs or other treatments | Single question |
| Perception of their effectiveness | ND |
| 1. Larsson et al., 2019 | CP occurrence | Single question | No |
| CP intensity | 11-point NRS |
| CP causes | NI |
| Use of drugs or other treatments | NI |
| Perception of their effectiveness | NI |
| 1. Shupler et al., 2019 | CP occurrence | Single question | No |
| CP intensity | 11-point NRS |
| CP causes | NI |
| Use of drugs or other treatments | NI |
| Perception of their effectiveness | NI |
| 1. Xu et al., 2019 | CP occurrence | Single question from the Chronic Conditions module in the CIDI 2.0 | No |
| CP intensity | 11-point NRS |
| CP causes | NI |
| Use of drugs or other treatments | NI |
| Perception of their effectiveness | Perceived Treatment Efficacy scale from CIDI 2.0 |
| 1. Dahlhamer et al., 2018 | CP occurrence | Single question | No |
| CP intensity | NI |
| CP causes | NI |
| Use of drugs or other treatments | NI |
| Perception of their effectiveness | NI |
| 1. Wong et al., 2018 | CP occurrence | Multiple questions | No |
| CP intensity | 10-point NRS |
| CP causes | Single question |
| Use of drugs or other treatments | Multiple questions |
| Perception of their effectiveness | Multiple questions |
| 1. Bierman and Lee, 2017 | CP occurrence | Single question | No |
| CP intensity | 2-rank VRS |
| CP causes | NI |
| Use of drugs or other treatments | NI |
| Perception of their effectiveness | NI |
| 1. de Souza et al., 2017 | CP occurrence | Multiple questions | No |
| CP intensity | 11-point NRS |
| CP causes | Single question |
| Use of drugs or other treatments | Multiple questions |
| Perception of their effectiveness | Single question |
| 1. Inoue et al., 2017 | CP occurrence | Multiple questions | No |
| CP intensity | 11-point NRS |
| CP causes | NI |
| Use of drugs or other treatments | Single question |
| Perception of their effectiveness | Single question |
| 1. Leão Ferreira et al., 2017 | CP occurrence | Single question | No |
| CP intensity | 11-point NRS |
| CP causes | NI |
| Use of drugs or other treatments | Single question |
| Perception of their effectiveness | NI |
| 1. Walters et al., 2017 | CP occurrence | Multiple questions | Yes |
| CP intensity | BPI |
| CP causes | Multiple questions |
| Use of drugs or other treatments | Multiple questions |
| Perception of their effectiveness | Multiple questions |
| 1. Elzahaf et al., 2016 | CP occurrence | Multiple questions | Yes |
| CP intensity | 10-point NRS |
| CP causes | Single question |
| Use of drugs or other treatments | Multiple questions |
| Perception of their effectiveness | Multiple questions |
| 1. Dueñas et al., 2015 | CP occurrence | Single question | No |
| CP intensity | 4-rank VRS |
| CP causes | NI |
| Use of drugs or other treatments | Single question |
| Perception of their effectiveness | NI |
| 1. Hauser et al., 2015 | CP occurrence | Single question | No |
| CP intensity | The bodily pain item of the SF-8 |
| CP causes | NI |
| Use of drugs or other treatments | NI |
| Perception of their effectiveness | NI |
| 1. Hollingshead et al., 2015 | CP occurrence | Multiple questions | No |
| CP intensity | NI |
| CP causes | NI |
| Use of drugs or other treatments | Single question |
| Perception of their effectiveness | NI |
| 1. Inoue et al., 2015 | CP occurrence | Single question | No |
| CP intensity | 11-point NRS |
| CP causes | NI |
| Use of drugs or other treatments | NI |
| Perception of their effectiveness | NI |
| 1. Macfarlane et al., 2015 | CP occurrence | Multiple questions | No |
| CP intensity | NI |
| CP causes | NI |
| Use of drugs or other treatments | NI |
| Perception of their effectiveness | NI |
| 1. Nahin, 2015 | CP occurrence | Multiple questions | Yes |
| CP intensity | NI |
| CP causes | NI |
| Use of drugs or other treatments | NI |
| Perception of their effectiveness | NI |
| 1. Roizenblatt et al., 2015 | CP occurrence | Single question | No |
| CP intensity | NI |
| CP causes | NI |
| Use of drugs or other treatments | NI |
| Perception of their effectiveness | NI |
| 1. Dureja et al., 2014 | CP occurrence | Multiple questions | No |
| CP intensity | 11-point NRS |
| CP causes | Single question |
| Use of drugs or other treatments | Multiple questions |
| Perception of their effectiveness | Multiple questions |
| 1. Häuser et al., 2014 | CP occurrence | Multiple questions | No |
| CP intensity | The bodily pain item of the SF-8 |
| CP causes | NI |
| Use of drugs or other treatments | NI |
| Perception of their effectiveness | NI |
| 1. Jackson et al., 2014 | CP occurrence | Multiple questions | No |
| CP intensity | NI |
| CP causes | Single question |
| Use of drugs or other treatments | Multiple questions |
| Perception of their effectiveness | NI |
| 1. Kennedy et al., 2014 | CP occurrence | Single question | No |
| CP intensity | NI |
| CP causes | Single question |
| Use of drugs or other treatments | NI |
| Perception of their effectiveness | NI |
| 1. Maia Costa Cabral et al., 2014 | CP occurrence | Multiple questions | No |
| CP intensity | CPG |
| CP causes | NI |
| Use of drugs or other treatments | NI |
| Perception of their effectiveness | NI |
| 1. Mohamed Zaki and Hairi, 2014 | CP occurrence | Single question | No |
| CP intensity | NI |
| CP causes | NI |
| Use of drugs or other treatments | Multiple questions |
| Perception of their effectiveness | NI |
| 1. Hairi et al., 2013 | CP occurrence | Single question | No |
| CP intensity | 5-rank VRS |
| CP causes | NI |
| Use of drugs or other treatments | NI |
| Perception of their effectiveness | NI |
| 1. Harifi et al., 2013 | CP occurrence | Single question | No |
| CP intensity | 11-point NRS |
| CP causes | NI |
| Use of drugs or other treatments | NI |
| Perception of their effectiveness | NI |
| 1. Olsen et al., 2013 | CP occurrence | ND | No |
| CP intensity | NI |
| CP causes | NI |
| Use of drugs or other treatments | ND |
| Perception of their effectiveness | NI |
| 1. Azevedo et al., 2012 | CP occurrence | Multiple questions | Yes |
| CP intensity | BPI |
| CP causes | Single question |
| Use of drugs or other treatments | Multiple questions |
| Perception of their effectiveness | Single question |
| 1. de Moraes Vieira et al., 2012 | CP occurrence | Single question | No |
| CP intensity | 0-10 VAS |
| CP causes | Single question |
| Use of drugs or other treatments | Single question |
| Perception of their effectiveness | Single question |
| 1. Dominick et al., 2012 | CP occurrence | Single question | No |
| CP intensity | NI |
| CP causes | ND |
| Use of drugs or other treatments | ND |
| Perception of their effectiveness | NI |
| 1. Fielding and Wong, 2012 | CP occurrence | Multiple questions | No |
| CP intensity | CPG |
| CP causes | NI |
| Use of drugs or other treatments | NI |
| Perception of their effectiveness | NI |
| 1. Kurita et al., 2012 | CP occurrence | Single question | No |
| CP intensity | 11-point NRS |
| CP causes | NI |
| Use of drugs or other treatments | Obtained from the Danish National Prescription Registry |
| Perception of their effectiveness | NI |
| 1. Landmark et al., 2012 | CP occurrence | Multiple questions | No |
| CP intensity | NI |
| CP causes | NI |
| Use of drugs or other treatments | NI |
| Perception of their effectiveness | NI |
| 1. Nitter et al., 2012 | CP occurrence | Single question | No |
| CP intensity | NI |
| CP causes | NI |
| Use of drugs or other treatments | NI |
| Perception of their effectiveness | NI |
| 1. Ohayon & Stingl, 2012 | CP occurrence | Multiple questions | No |
| CP intensity | 3-rank VRS |
| CP causes | Single question |
| Use of drugs or other treatments | Multiple questions |
| Perception of their effectiveness | NI |
| 1. Reitsma et al., 2012 | CP occurrence | Single question | No |
| CP intensity | NI |
| CP causes | NI |
| Use of drugs or other treatments | NI |
| Perception of their effectiveness | NI |
| 1. Zarei et al., 2012 | CP occurrence | Multiple questions | No |
| CP intensity | NI |
| CP causes | Multiple questions |
| Use of drugs or other treatments | NI |
| Perception of their effectiveness | NI |
| 1. Dominick et al., 2011 | CP occurrence | Single question | No |
| CP intensity | Pain severity item of the SF-36 |
| CP causes | Single question |
| Use of drugs or other treatments | Single question |
| Perception of their effectiveness | NI |
| 1. Hagen et al., 2011 | CP occurrence | Single question | No |
| CP intensity | NI |
| CP causes | NI |
| Use of drugs or other treatments | NI |
| Perception of their effectiveness | NI |
| 1. Landmark et al., 2011 | CP occurrence | Single question | No |
| CP intensity | 6-rank VRS |
| CP causes | NI |
| Use of drugs or other treatments | NI |
| Perception of their effectiveness | NI |
| 1. Javier and Lu, 2011 | CP occurrence | Multiple questions | No |
| CP intensity | VAS |
| CP causes | NI |
| Use of drugs or other treatments | Single question |
| Perception of their effectiveness | Single question |
| 1. Raftery et al., 2011 | CP occurrence | Multiple questions | No |
| CP intensity | CPG |
| CP causes | ND |
| Use of drugs or other treatments | NI |
| Perception of their effectiveness | NI |
| 1. Reitsma et al., 2011 | CP occurrence | Single question | No |
| CP intensity | NI |
| CP causes | NI |
| Use of drugs or other treatments | NI |
| Perception of their effectiveness | NI |
| 1. Schopflocher et al., 2011 | CP occurrence | Single question | No |
| CP intensity | 11-point NRS |
| CP causes | Single question |
| Use of drugs or other treatments | NI |
| Perception of their effectiveness | NI |
| 1. Toblin et al., 2011 | CP occurrence | Multiple questions | No |
| CP intensity | 11-point NRS |
| CP causes | Single question |
| Use of drugs or other treatments | Single question |
| Perception of their effectiveness | Single question |
| 1. Wong & Fielding, 2011 | CP occurrence | Multiple questions | No |
| CP intensity | CPG |
| CP causes | NI |
| Use of drugs or other treatments | NI |
| Perception of their effectiveness | NI |
| 1. Ablin et al., 2010 | CP occurrence | Multiple questions | No |
| CP intensity | NI |
| CP causes | NI |
| Use of drugs or other treatments | ND |
| Perception of their effectiveness | NI |
| 1. Currow et al., 2010 | CP occurrence | Single question | No |
| CP intensity | NI |
| CP causes | NI |
| Use of drugs or other treatments | NI |
| Perception of their effectiveness | NI |
| 1. Gunnarsdóttir et al., 2010 | CP occurrence | Multiple question | No |
| CP intensity | BPI |
| CP causes | NI |
| Use of drugs or other treatments | NI |
| Perception of their effectiveness | NI |
| 1. Jakobsson, 2010 | CP occurrence | ND | No |
| CP intensity | ND |
| CP causes | ND |
| Use of drugs or other treatments | NI |
| Perception of their effectiveness | NI |
| 1. Johannes et al., 2010 | CP occurrence | Multiple questions | Yes |
| CP intensity | 11-point NRS |
| CP causes | Single question |
| Use of drugs or other treatments | NI |
| Perception of their effectiveness | NI |
| 1. Løyland et al., 2010 | CP occurrence | Multiple questions | No |
| CP intensity | 11-point NRS |
| CP causes | Single question |
| Use of drugs or other treatments | Multiple questions |
| Perception of their effectiveness | NI |
| 1. Ohayon & Schatzberg, 2010 | CP occurrence | Multiple questions | No |
| CP intensity | 7-point NRS |
| CP causes | Single question |
| Use of drugs or other treatments | Multiple questions |
| Perception of their effectiveness | NI |
| 1. Torrance et al., 2010 | CP occurrence | Multiple questions | No |
| CP intensity | CPG |
| CP causes | Multiple questions |
| Use of drugs or other treatments | NI |
| Perception of their effectiveness | NI |
| 1. Sjøgren et al., 2009 | CP occurrence | Single question | No |
| CP intensity | NI |
| CP causes | NI |
| Use of drugs or other treatments | NI |
| Perception of their effectiveness | Multiple questions |
| 1. Toth et al., 2009 | CP occurrence | Multiple questions | Yes |
| CP intensity | VAS |
| CP causes | NI |
| Use of drugs or other treatments | NI |
| Perception of their effectiveness | NI |
| 1. Yeo & Tay, 2009 | CP occurrence | Single question | No |
| CP intensity | 10-rank VRS |
| CP causes | ND |
| Use of drugs or other treatments | NI |
| Perception of their effectiveness | NI |
| 1. Bouhassira et al., 2008 | CP occurrence | Multiple questions | No |
| CP intensity | BPI |
| CP causes | NI |
| Use of drugs or other treatments | NI |
| Perception of their effectiveness | NI |
| 1. Hardt et al., 2008 | CP occurrence | Multiple questions | No |
| CP intensity | NI |
| CP causes | NI |
| Use of drugs or other treatments | NI |
| Perception of their effectiveness | NI |
| 1. Neville et al., 2008 | CP occurrence | Single question | No |
| CP intensity | BPI |
| CP causes | NI |
| Use of drugs or other treatments | Multiple questions |
| Perception of their effectiveness | NI |
| 1. Sá et al., 2008 | CP occurrence | Multiple questions | No |
| CP intensity | NI |
| CP causes | NI |
| Use of drugs or other treatments | NI |
| Perception of their effectiveness | NI |
| 1. Tsang et al., 2008 | CP occurrence | Single question | No |
| CP intensity | NI |
| CP causes | NI |
| Use of drugs or other treatments | NI |
| Perception of their effectiveness | NI |
| 1. Watkins et al., 2008 | CP occurrence | Single question | No |
| CP intensity | ND |
| CP causes | NI |
| Use of drugs or other treatments | ND |
| Perception of their effectiveness | ND |
| 1. Bhattarai et al., 2007 | CP occurrence | Multiple questions | No |
| CP intensity | 3-rank VRS |
| CP causes | NI |
| Use of drugs or other treatments | NI |
| Perception of their effectiveness | NI |
| 1. Chung et al., 2007 | CP occurrence | Multiple questions | No |
| CP intensity | NI |
| CP causes | NI |
| Use of drugs or other treatments | NI |
| Perception of their effectiveness | NI |
| 1. Parsons et al., 2007 | CP occurrence | Single question | No |
| CP intensity | CPG |
| CP causes | NI |
| Use of drugs or other treatments | NI |
| Perception of their effectiveness | NI |
| 1. Breivik et al., 2006 | CP occurrence | Multiple questions | No |
| CP intensity | 10-point NRS |
| CP causes | Single question |
| Use of drugs or other treatments | Multiple questions |
| Perception of their effectiveness | Multiple questions |
| 1. Scott et al., 2006 | CP occurrence | Single question | No |
| CP intensity | NI |
| CP causes | NI |
| Use of drugs or other treatments | NI |
| Perception of their effectiveness | NI |
| 1. Svebak et al., 2006 | CP occurrence | Single question | No |
| CP intensity | NI |
| CP causes | NI |
| Use of drugs or other treatments | NI |
| Perception of their effectiveness | NI |
| 1. Torrance et al., 2006 | CP occurrence | Multiple questions | No |
| CP intensity | 11-point NRS |
| CP causes | Single question |
| Use of drugs or other treatments | NI |
| Perception of their effectiveness | NI |
| 1. Tripp et al., 2006 | CP occurrence | Single question | No |
| CP intensity | CPG |
| CP causes | NI |
| Use of drugs or other treatments | Single question |
| Perception of their effectiveness | NI |
| 1. Mallen et al., 2005 | CP occurrence | Multiple questions | No |
| CP intensity | CPG |
| CP causes | NI |
| Use of drugs or other treatments | NI |
| Perception of their effectiveness | NI |
| 1. Foley et al., 2004 | CP occurrence | Single question | No |
| CP intensity | NI |
| CP causes | NI |
| Use of drugs or other treatments | NI |
| Perception of their effectiveness | NI |
| 1. Gerdle et al., 2004 | CP occurrence | Multiple questions | No |
| CP intensity | VRS |
| CP causes | NI |
| Use of drugs or other treatments | NI |
| Perception of their effectiveness | NI |
| 1. Rustøen et al., 2004 | CP occurrence | Multiple questions | No |
| CP intensity | 11-point NRS |
| CP causes | Single question |
| Use of drugs or other treatments | Multiple questions |
| Perception of their effectiveness | NI |
| 1. Blyth et al., 2003 | CP occurrence | Single question | No |
| CP intensity | CPG |
| CP causes | Single question |
| Use of drugs or other treatments | NI |
| Perception of their effectiveness | NI |
| 1. Mäntyselkä et al., 2003 | CP occurrence | Multiple questions | No |
| CP intensity | NI |
| CP causes | NI |
| Use of drugs or other treatments | NI |
| Perception of their effectiveness | NI |
| 1. Picavet and Schouten, 2003 | CP occurrence | Multiple questions | No |
| CP intensity | NI |
| CP causes | Single question |
| Use of drugs or other treatments | Multiple questions |
| Perception of their effectiveness | NI |
| 1. Bergman et al., 2002 | CP occurrence | Single question | Yes |
| CP intensity | NI |
| CP causes | NI |
| Use of drugs or other treatments | NI |
| Perception of their effectiveness | NI |
| 1. Catalá et al., 2002 | CP occurrence | Multiple questions | Yes |
| CP intensity | NI |
| CP causes | Single question |
| Use of drugs or other treatments | Single question |
| Perception of their effectiveness | NI |
| 1. Elliott et al., 2002 | CP occurrence | Multiple questions | No |
| CP intensity | CPG |
| CP causes | NI |
| Use of drugs or other treatments | NI |
| Perception of their effectiveness | NI |
| 1. Hoffman et al., 2002 | CP occurrence | Single question | No |
| CP intensity | 6-point NRS |
| CP causes | Single question |
| Use of drugs or other treatments | Single question |
| Perception of their effectiveness | NI |
| 1. Moulin et al., 2002 | CP occurrence | Single question | No |
| CP intensity | 11-point NRS |
| CP causes | Single question |
| Use of drugs or other treatments | Single question |
| Perception of their effectiveness | NI |
| 1. Ng et al., 2002 | CP occurrence | Multiple questions | No |
| CP intensity | 11-point NRS |
| CP causes | Single question |
| Use of drugs or other treatments | Multiple questions |
| Perception of their effectiveness | Multiple questions |
| 1. Bergman et al., 2001 | CP occurrence | Single question | No |
| CP intensity | NI |
| CP causes | NI |
| Use of drugs or other treatments | NI |
| Perception of their effectiveness | NI |
| 1. Blyth et al., 2001 | CP occurrence | Single question | No |
| CP intensity | NI |
| CP causes | NI |
| Use of drugs or other treatments | NI |
| Perception of their effectiveness | NI |
| 1. Smith et al., 2001 | CP occurrence | CDQ | No |
| CP intensity | CPG |
| CP causes | NI |
| Use of drugs or other treatments | LEN |
| Perception of their effectiveness | NI |
| 1. Buskila et al., 2000 | CP occurrence | Multiple questions | No |
| CP intensity | NI |
| CP causes | NI |
| Use of drugs or other treatments | Single question |
| Perception of their effectiveness | NI |
| 1. Elliott et al., 1999 | CP occurrence | Multiple questions | Yes |
| CP intensity | CPG |
| CP causes | Single question |
| Use of drugs or other treatments | LEN |
| Perception of their effectiveness | NI |
| 1. Chrubasik et al., 1998 | CP occurrence | Single question | No |
| CP intensity | 3-rank VRS |
| CP causes | Single question |
| Use of drugs or other treatments | Multiple questions |
| Perception of their effectiveness | Multiple questions |
| 1. Andersson et al., 1993 | CP occurrence | Single question with a description | Yes |
| CP intensity | 5-point NRS |
| CP causes | NI |
| Use of drugs or other treatments | NI |
| Perception of their effectiveness | NI |
| 1. Magni et al., 1993 | CP occurrence | Multiple questions | No |
| CP intensity | NI |
| CP causes | NI |
| Use of drugs or other treatments | NI |
| Perception of their effectiveness | NI |
| 1. Bowsher et al., 1991 | CP occurrence | Single question | No |
| CP intensity | NI |
| CP causes | Single question |
| Use of drugs or other treatments | Single question |
| Perception of their effectiveness | NI |
| 1. Magni et al., 1990 | CP occurrence | Multiple questions | No |
| CP intensity | NI |
| CP causes | NI |
| Use of drugs or other treatments | NI |
| Perception of their effectiveness | NI |
| Abbreviations: BPI, Brief Pain Inventory; CDQ, Simple Case Definition Questionnaire; CIDI 2.0, Composite International Diagnostic Instrument 2.0; CP, Chronic Pain; CPG, Chronic Pain Grade questionnaire; LEN, Level of Expressed Needs questionnaire; ND, Not declared (i.e., the dimension was investigated, but how it was investigated was not specified); NI, Not investigated (i.e., the dimension was not investigated); NRS, Numerical Rating Scale; SF-36, Short Form Health Survey-36; SF-8, Short Form Health Survey-8; VAS, Visual Analogue Scale; VRS, Verbal Rating Scale. | | | |

**List of the references of the retrieved studies**

1. Yongjun Z, Tingjie Z, Xiaoqiu Y, et al. A survey of chronic pain in China. *Libyan J Med*. 2020;15(1):1730550. doi:10.1080/19932820.2020.1730550
2. Larsson B, Dragioti E, Grimby-Ekman A, Gerdle B, Björk J. Predictors of chronic pain intensity, spread, and sensitivity in the general population: A two-year follow-up study from the SWEPAIN cohort. *J Rehabil Med*. 2019;51(3):183-192. doi:10.2340/16501977-2519.
3. Shupler MS, Kramer JK, Cragg JJ, Jutzeler CR, Whitehurst DGT. Pan-Canadian Estimates of Chronic Pain Prevalence From 2000 to 2014: A Repeated Cross-Sectional Survey Analysis. *J Pain*. 2019;20(5):557-565. doi:10.1016/j.jpain.2018.10.010.
4. Xu A, Hilton E, Arkema R, Tintle NL, Helming LM. Epidemiology of chronic pain in Ukraine: Findings from the World Mental Health Survey. *PLoS One*. 2019;14(10):e0224084. Published 2019 Oct 17. doi:10.1371/journal.pone.0224084
5. Dahlhamer J, Lucas J, Zelaya C, et al. Prevalence of Chronic Pain and High-Impact Chronic Pain Among Adults - United States, 2016. *MMWR Morb Mortal Wkly Rep*. 2018;67(36):1001-1006. Published 2018 Sep 14. doi:10.15585/mmwr.mm6736a2
6. Wong SSC, Choi SW, Cheung CW. A comparison of chronic pain with and without neuropathic characteristics in a Hong Kong Chinese population: An analysis of pain related outcomes and patient help seeking behaviour. *PLoS One*. 2018;13(10):e0204054. Published 2018 Oct 24. doi:10.1371/journal.pone.0204054
7. Bierman A, Lee Y. Chronic Pain and Psychological Distress Among Older Adults: A National Longitudinal Study. *Res Aging*. 2018;40(5):432-455. doi:10.1177/0164027517704970.
8. de Souza JB, Grossmann E, Perissinotti DMN, de Oliveira Junior JO, da Fonseca PRB, Posso IP. Prevalence of Chronic Pain, Treatments, Perception, and Interference on Life Activities: Brazilian Population-Based Survey*. Pain Res Manag*. 2017;2017:4643830. doi:10.1155/2017/4643830.
9. Inoue S, Taguchi T, Yamashita T, Nakamura M, Ushida T. The prevalence and impact of chronic neuropathic pain on daily and social life: A nationwide study in a Japanese population. *Eur J Pain*. 2017;21(4):727-737. doi:10.1002/ejp.977.
10. Leão Ferreira KA, Bastos TR, Andrade DC, et al. Prevalence of chronic pain in a metropolitan area of a developing country: a population-based study. *Arq Neuropsiquiatr*. 2016;74(12):990-998. doi:10.1590/0004-282X20160156.
11. Walters JL, Baxter K, Chapman H, et al. Chronic Pain and Associated Factors in India and Nepal: A Pilot Study of the Vanderbilt Global Pain Survey. *Anesth Analg.* 2017;125(5):1616-1626. doi:10.1213/ANE.0000000000002360.
12. Elzahaf RA, Johnson MI, Tashani OA. The epidemiology of chronic pain in Libya: a cross-sectional telephone survey. *BMC Public Health*. 2016;16(1):776. Published 2016 Aug 11. doi:10.1186/s12889-016-3349-6.
13. Dueñas M, Salazar A, Ojeda B, et al. A nationwide study of chronic pain prevalence in the general spanish population: identifying clinical subgroups through cluster analysis. *Pain Med*. 2015;16(4):811-822. doi:10.1111/pme.12640.
14. Häuser W, Schmutzer G, Hilbert A, Brähler E, Henningsen P. Prevalence of Chronic Disabling Noncancer Pain and Associated Demographic and Medical Variables: A Cross-Sectional Survey in the General German Population. *Clin J Pain.* 2015;31(10):886-892. doi:10.1097/AJP.0000000000000173.
15. Hollingshead NA, Vrany EA, Stewart JC, Hirsh AT. Differences in Mexican Americans' Prevalence of Chronic Pain and Co-Occurring Analgesic Medication and Substance Use Relative to Non-Hispanic White and Black Americans: Results from NHANES 1999-2004. *Pain Med*. 2016;17(6):1001-1009. doi:10.1093/pm/pnv003.
16. Inoue S, Kobayashi F, Nishihara M, et al. Chronic Pain in the Japanese Community--Prevalence, Characteristics and Impact on Quality of Life. *PLoS One*. 2015;10(6):e0129262. Published 2015 Jun 15. doi:10.1371/journal.pone.0129262.
17. Macfarlane GJ, Beasley M, Smith BH, Jones GT, Macfarlane TV. Can large surveys conducted on highly selected populations provide valid information on the epidemiology of common health conditions? An analysis of UK Biobank data on musculoskeletal pain. *Br J Pain.* 2015;9(4):203-212. doi:10.1177/2049463715569806.
18. Nahin RL. Estimates of pain prevalence and severity in adults: United States, 2012. *J Pain*. 2015;16(8):769-780. doi:10.1016/j.jpain.2015.05.002.
19. Roizenblatt S, Souza AL, Palombini L, Godoy LM, Tufik S, Bittencourt LR. Musculoskeletal Pain as a Marker of Health Quality. Findings from the Epidemiological Sleep Study among the Adult Population of São Paulo City [published correction appears in PLoS One. 2016;11(2):e0150330]. *PLoS One*. 2015;10(11):e0142726. Published 2015 Nov 24. doi:10.1371/journal.pone.0142726.
20. Dureja GP, Jain PN, Shetty N, et al. Prevalence of chronic pain, impact on daily life, and treatment practices in India. Pain Pract. 2014;14(2):E51-E62. doi:10.1111/papr.12132.
21. Häuser W, Wolfe F, Henningsen P, Schmutzer G, Brähler E, Hinz A. Untying chronic pain: prevalence and societal burden of chronic pain stages in the general population - a cross-sectional survey. *BMC Public Health*. 2014;14:352. Published 2014 Apr 13. doi:10.1186/1471-2458-14-352.
22. Jackson T, Chen H, Iezzi T, Yee M, Chen F. Prevalence and correlates of chronic pain in a random population study of adults in Chongqing, China. *Clin J Pain.* 2014;30(4):346-352. doi:10.1097/AJP.0b013e31829ea1e3.
23. Kennedy J, Roll JM, Schraudner T, Murphy S, McPherson S. Prevalence of persistent pain in the U.S. adult population: new data from the 2010 national health interview survey. *J Pain*. 2014;15(10):979-984. doi:10.1016/j.jpain.2014.05.009.
24. Maia Costa Cabral D, Sawaya Botelho Bracher E, Dylese Prescatan Depintor J, Eluf-Neto J. Chronic pain prevalence and associated factors in a segment of the population of São Paulo City. *J Pain*. 2014;15(11):1081-1091. doi:10.1016/j.jpain.2014.07.001.
25. Mohamed Zaki LR, Hairi NN. Chronic pain and pattern of health care utilization among Malaysian elderly population: National Health and Morbidity Survey III (NHMS III, 2006). *Maturitas*. 2014;79(4):435-441. doi:10.1016/j.maturitas.2014.08.014.
26. Hairi NN, Cumming RG, Blyth FM, Naganathan V. Chronic pain, impact of pain and pain severity with physical disability in older people--is there a gender difference?. *Maturitas*. 2013;74(1):68-73. doi:10.1016/j.maturitas.2012.10.001.
27. Harifi G, Amine M, Ait Ouazar M, et al. Prevalence of chronic pain with neuropathic characteristics in the Moroccan general population: a national survey. *Pain Med*. 2013;14(2):287-292. doi:10.1111/pme.12009.
28. Olsen RB, Bruehl S, Nielsen CS, Rosseland LA, Eggen AE, Stubhaug A. Hypertension prevalence and diminished blood pressure-related hypoalgesia in individuals reporting chronic pain in a general population: the Tromsø study. *Pain*. 2013;154(2):257-262. doi:10.1016/j.pain.2012.10.020.
29. Azevedo LF, Costa-Pereira A, Mendonça L, Dias CC, Castro-Lopes JM. Epidemiology of chronic pain: a population-based nationwide study on its prevalence, characteristics and associated disability in Portugal. *J Pain.* 2012;13(8):773-783. doi:10.1016/j.jpain.2012.05.012
30. de Moraes Vieira EB, Garcia JB, da Silva AA, Mualem Araújo RL, Jansen RC. Prevalence, characteristics, and factors associated with chronic pain with and without neuropathic characteristics in São Luís, Brazil. *J Pain Symptom Manage*. 2012;44(2):239-251. doi:10.1016/j.jpainsymman.2011.08.014.
31. Dominick CH, Blyth FM, Nicholas MK. Unpacking the burden: understanding the relationships between chronic pain and comorbidity in the general population. *Pain*. 2012;153(2):293-304. doi:10.1016/j.pain.2011.09.018.
32. Fielding R, Wong WS. Prevalence of chronic pain, insomnia, and fatigue in Hong Kong. *Hong Kong Med J*. 2012;18 Suppl 3:9-12..
33. Kurita GP, Sjøgren P, Juel K, Højsted J, Ekholm O. The burden of chronic pain: a cross-sectional survey focussing on diseases, immigration, and opioid use. *Pain*. 2012;153(12):2332-2338. doi:10.1016/j.pain.2012.07.023.
34. Landmark T, Romundstad P, Dale O, Borchgrevink PC, Kaasa S. Estimating the prevalence of chronic pain: validation of recall against longitudinal reporting (the HUNT pain study). *Pain*. 2012;153(7):1368-1373. doi:10.1016/j.pain.2012.02.004.
35. Nitter AK, Pripp AH, Forseth KØ. Are sleep problems and non-specific health complaints risk factors for chronic pain? A prospective population-based study with 17 year follow-up. *Scand J Pain.* 2012;3(4):210-217. Published 2012 Oct 1. doi:10.1016/j.sjpain.2012.04.001.
36. Ohayon MM, Stingl JC. Prevalence and comorbidity of chronic pain in the German general population. *J Psychiatr Res*. 2012;46(4):444-450. doi:10.1016/j.jpsychires.2012.01.001.
37. Reitsma M, Tranmer JE, Buchanan DM, VanDenKerkhof EG. The epidemiology of chronic pain in Canadian men and women between 1994 and 2007: longitudinal results of the National Population Health Survey. *Pain Res Manag*. 2012;17(3):166-172. doi:10.1155/2012/875924.
38. Zarei S, Bigizadeh S, Pourahmadi M, Ghobadifar MA. Chronic Pain and Its Determinants: A Population-based Study in Southern Iran. Korean *J Pain*. 2012;25(4):245-253. doi:10.3344/kjp.2012.25.4.245.
39. Dominick C, Blyth F, Nicholas M. Patterns of chronic pain in the New Zealand population. *N Z Med J.* 2011;124(1337):63-76. Published 2011 Jun 24..
40. Hagen K, Linde M, Heuch I, Stovner LJ, Zwart JA. Increasing prevalence of chronic musculoskeletal complaints. A large 11-year follow-up in the general population (HUNT 2 and 3). *Pain Med*. 2011;12(11):1657-1666. doi:10.1111/j.1526-4637.2011.01240.x.
41. Landmark T, Romundstad P, Borchgrevink PC, Kaasa S, Dale O. Associations between recreational exercise and chronic pain in the general population: evidence from the HUNT 3 study. *Pain*. 2011;152(10):2241-2247. doi:10.1016/j.pain.2011.04.029.
42. Javier F, Lu H. Prevalence and treatment of chronic pain in the Philippines. *Philipp J Intern Med*, 2011;*49*(2):61-69.
43. Raftery MN, Sarma K, Murphy AW, De la Harpe D, Normand C, McGuire BE. Chronic pain in the Republic of Ireland--community prevalence, psychosocial profile and predictors of pain-related disability: results from the Prevalence, Impact and Cost of Chronic Pain (PRIME) study, part 1. *Pain*. 2011;152(5):1096-1103. doi:10.1016/j.pain.2011.01.019.
44. Reitsma ML, Tranmer JE, Buchanan DM, Vandenkerkhof EG. The prevalence of chronic pain and pain-related interference in the Canadian population from 1994 to 2008. *Chronic Dis Inj Can*. 2011;31(4):157-164..
45. Schopflocher D, Taenzer P, Jovey R. The prevalence of chronic pain in Canada. *Pain Res Manag*. 2011;16(6):445-450. doi:10.1155/2011/876306.
46. Toblin RL, Mack KA, Perveen G, Paulozzi LJ. A population-based survey of chronic pain and its treatment with prescription drugs. *Pain*. 2011;152(6):1249-1255. doi:10.1016/j.pain.2010.12.036.
47. Wong WS, Fielding R. Prevalence and characteristics of chronic pain in the general population of Hong Kong. *J Pain*. 2011;12(2):236-245. doi:10.1016/j.jpain.2010.07.004.
48. Ablin JN, Cohen H, Clauw DJ, et al. A tale of two cities - the effect of low intensity conflict on prevalence and characteristics of musculoskeletal pain and somatic symptoms associated with chronic stress. *Clin Exp Rheumatol*. 2010;28(6 Suppl 63):S15-S21..
49. Currow DC, Agar M, Plummer JL, Blyth FM, Abernethy AP. Chronic pain in South Australia - population levels that interfere extremely with activities of daily living. *Aust N Z J Public Health*. 2010;34(3):232-239. doi:10.1111/j.1753-6405.2010.00519.x.
50. Gunnarsdottir S, Ward SE, Serlin RC. A population based study of the prevalence of pain in Iceland. *Scand J Pain*. 2010;1(3):151-157. Published 2010 Jul 1. doi:10.1016/j.sjpain.2010.05.028.
51. Jakobsson U. The epidemiology of chronic pain in a general population: results of a survey in southern Sweden. *Scand J Rheumatol*. 2010;39(5):421-429. doi:10.3109/03009741003685616.
52. Johannes CB, Le TK, Zhou X, Johnston JA, Dworkin RH. The prevalence of chronic pain in United States adults: results of an Internet-based survey. *J Pain*. 2010;11(11):1230-1239. doi:10.1016/j.jpain.2010.07.002.
53. Løyland B, Miaskowski C, Wahl AK, Rustøen T. Prevalence and characteristics of chronic pain among long-term social assistance recipients compared to the general population in Norway. *Clin J Pain*. 2010;26(7):624-630. doi:10.1097/AJP.0b013e3181e0de43.
54. Ohayon MM, Schatzberg AF. Chronic pain and major depressive disorder in the general population. *J Psychiatr Res*. 2010;44(7):454-461. doi:10.1016/j.jpsychires.2009.10.013.
55. Torrance N, Elliott AM, Lee AJ, Smith BH. Severe chronic pain is associated with increased 10 year mortality. A cohort record linkage study. *Eur J Pain.* 2010;14(4):380-386. doi:10.1016/j.ejpain.2009.07.006.
56. Sjøgren P, Grønbæk M, Peuckmann V, Ekholm O. A population-based cohort study on chronic pain: the role of opioids. *Clin J Pain*. 2010;26(9):763-769. doi:10.1097/AJP.0b013e3181f15daf.
57. Toth C, Lander J, Wiebe S. The prevalence and impact of chronic pain with neuropathic pain symptoms in the general population. *Pain Med*. 2009;10(5):918-929. doi:10.1111/j.1526-4637.2009.00655.x.
58. Yeo SN, Tay KH. Pain prevalence in Singapore. *Ann Acad Med Singap*, 2009;*38*(11):937–942.
59. Bouhassira D, Lantéri-Minet M, Attal N, Laurent B, Touboul C. Prevalence of chronic pain with neuropathic characteristics in the general population. *Pain*. 2008;136(3):380-387. doi:10.1016/j.pain.2007.08.013.
60. Hardt J, Jacobsen C, Goldberg J, Nickel R, Buchwald D. Prevalence of chronic pain in a representative sample in the United States. *Pain Med*. 2008;9(7):803-812. doi:10.1111/j.1526-4637.2008.00425.x.
61. Neville A, Peleg R, Singer Y, Sherf M, Shvartzman P. Chronic pain: a population-based study. *Isr Med Assoc J*, 2008;*10*(10):676.
62. Sá KN, Baptista AF, Matos MA, Lessa Í. Chronic pain and gender in Salvador population, Brazil. *Pain*. 2008;139(3):498-506. doi:10.1016/j.pain.2008.06.008.
63. Tsang A, Von Korff M, Lee S, et al. Common chronic pain conditions in developed and developing countries: gender and age differences and comorbidity with depression-anxiety disorders [published correction appears in J Pain. 2009 May;10(5):553. Demytteneare, K [added]]. *J Pain*. 2008;9(10):883-891. doi:10.1016/j.jpain.2008.05.005.
64. Watkins EA, Wollan PC, Melton LJ 3rd, Yawn BP. A population in pain: report from the Olmsted County health study. *Pain Med*. 2008;9(2):166-174. doi:10.1111/j.1526-4637.2007.00280.x.
65. Bhattarai B, Pokhrel PK, Tripathi M, et al. Chronic pain and cost: an epidemiological study in the communities of Sunsari district of Nepal. *Nepal Med Coll J*. 2007;9(1):6-11..
66. Chung JW, Wong TK. Prevalence of pain in a community population. *Pain Med*. 2007;8(3):235-242. doi: 10.1111/j.1526-4637.2006.00205.x.
67. Parsons S, Breen A, Foster NE, et al. Prevalence and comparative troublesomeness by age of musculoskeletal pain in different body locations. *Fam Pract*. 2007;24(4):308-316. doi:10.1093/fampra/cmm027.
68. Breivik H, Collett B, Ventafridda V, Cohen R, Gallacher D. Survey of chronic pain in Europe: prevalence, impact on daily life, and treatment. *Eur J Pain*. 2006;10(4):287-333. doi:10.1016/j.ejpain.2005.06.009.
69. Scott KM, Oakley Browne MA, McGee MA, Wells JE; New Zealand Mental Health Survey Research Team. Mental-physical comorbidity in Te Rau Hinengaro: the New Zealand Mental Health Survey. *Aust N Z J Psychiatry*. 2006;40(10):882-888. doi:10.1080/j.1440-1614.2006.01907.x
70. Svebak S, Hagen K, Zwart JA. One-year prevalence of chronic musculoskeletal pain in a large adult Norwegian County population: relations with age and gender–The HUNT Study. *J Musculoskelet Pain*. 2006;*14*(1):21-28.
71. Torrance N, Smith BH, Bennett MI, Lee AJ. The epidemiology of chronic pain of predominantly neuropathic origin. Results from a general population survey. *J Pain*. 2006;7(4):281-289. doi:10.1016/j.jpain.2005.11.008.
72. Tripp DA, VanDenKerkhof EG, McAlister M. Prevalence and determinants of pain and pain-related disability in urban and rural settings in southeastern Ontario. *Pain Res Manag*. 2006;11(4):225-233. doi:10.1155/2006/720895.
73. Mallen C, Peat G, Thomas E, Croft P. Severely disabling chronic pain in young adults: prevalence from a population-based postal survey in North Staffordshire. *BMC Musculoskelet Disord*. 2005;6:42. Published 2005 Jul 21. doi:10.1186/1471-2474-6-42.
74. Foley D, Ancoli-Israel S, Britz P, Walsh J. Sleep disturbances and chronic disease in older adults: results of the 2003 National Sleep Foundation Sleep in America Survey. *J Psychosom Res*. 2004;56(5):497-502. doi:10.1016/j.jpsychores.2004.02.010.
75. Gerdle B, Björk J, Henriksson C, Bengtsson A. Prevalence of current and chronic pain and their influences upon work and healthcare-seeking: a population study. *J Rheumatol*. 2004;31(7):1399-1406..
76. Rustøen T, Wahl AK, Hanestad BR, Lerdal A, Paul S, Miaskowski C. Prevalence and characteristics of chronic pain in the general Norwegian population. *Eur J Pain*. 2004;8(6):555-565. doi:10.1016/j.ejpain.2004.02.002.
77. Blyth FM, March LM, Cousins MJ. Chronic pain-related disability and use of analgesia and health services in a Sydney community. *Med J Aust*. 2003;179(2):84-87. doi:10.5694/j.1326-5377.2003.tb05441.x.
78. Mäntyselkä PT, Turunen JH, Ahonen RS, Kumpusalo EA. Chronic pain and poor self-rated health. *JAMA*. 2003;290(18):2435-2442. doi:10.1001/jama.290.18.2435.
79. Picavet HS, Schouten JS. Musculoskeletal pain in the Netherlands: prevalences, consequences and risk groups, the DMC(3)-study. *Pain*. 2003;102(1-2):167-178. doi:10.1016/s0304-3959(02)00372-x.
80. Bergman S, Herrström P, Jacobsson LT, Petersson IF. Chronic widespread pain: a three year followup of pain distribution and risk factors. *J Rheumatol*. 2002;29(4):818-825..
81. Català E, Reig E, Artés M, Aliaga L, López JS, Segú JL. Prevalence of pain in the Spanish population: telephone survey in 5000 homes. *Eur J Pain*. 2002;6(2):133-140. doi:10.1053/eujp.2001.0310.
82. Elliott AM, Smith BH, Hannaford PC, Smith WC, Chambers WA. The course of chronic pain in the community: results of a 4-year follow-up study. *Pain*. 2002;99(1-2):299-307. doi:10.1016/s0304-3959(02)00138-0.
83. Hoffman PK, Meier BP, Council JR. A comparison of chronic pain between an urban and rural population. *J Community Health Nurs*. 2002;19(4):213-224. doi:10.1207/S15327655JCHN1904_02.
84. Moulin DE, Clark AJ, Speechley M, Morley-Forster PK. Chronic pain in Canada--prevalence, treatment, impact and the role of opioid analgesia. *Pain Res Manag*. 2002;7(4):179-184. doi:10.1155/2002/323085.
85. Ng KF, Tsui SL, Chan WS. Prevalence of common chronic pain in Hong Kong adults. *Clin J Pain*. 2002;18(5):275-281. doi:10.1097/00002508-200209000-00001.
86. Bergman S, Herrström P, Högström K, Petersson IF, Svensson B, Jacobsson LT. Chronic musculoskeletal pain, prevalence rates, and sociodemographic associations in a Swedish population study. *J Rheumatol*. 2001;28(6):1369-1377.
87. Blyth FM, March LM, Brnabic AJ, Jorm LR, Williamson M, Cousins MJ. Chronic pain in Australia: a prevalence study. *Pain*. 2001;89(2-3):127-134. doi:10.1016/s0304-3959(00)00355-9.
88. Smith BH, Elliott AM, Chambers WA, Smith WC, Hannaford PC, Penny K. The impact of chronic pain in the community. *Fam Pract*. 2001;18(3):292-299. doi:10.1093/fampra/18.3.292.
89. Buskila D, Abramov G, Biton A, Neumann L. The prevalence of pain complaints in a general population in Israel and its implications for utilization of health services. *J Rheumatol*. 2000;27(6):1521-1525.
90. Elliott AM, Smith BH, Penny KI, Smith WC, Chambers WA. The epidemiology of chronic pain in the community. *Lancet*. 1999;354(9186):1248-1252. doi:10.1016/s0140-6736(99)03057-3.
91. Chrubasik S, Junck H, Zappe HA, Stutzke O. A survey on pain complaints and health care utilization in a German population sample. *Eur J Anaesthesiol*. 1998;15(4):397-408. doi:10.1046/j.1365-2346.1998.00317.x.
92. Andersson HI, Ejlertsson G, Leden I, Rosenberg C. Chronic pain in a geographically defined general population: studies of differences in age, gender, social class, and pain localization. *Clin J Pain*. 1993;9(3):174-182. doi:10.1097/00002508-199309000-00004.
93. Magni G, Marchetti M, Moreschi C, Merskey H, Luchini SR. Chronic musculoskeletal pain and depressive symptoms in the National Health and Nutrition Examination. I. Epidemiologic follow-up study. *Pain*. 1993;53(2):163-168. doi:10.1016/0304-3959(93)90076-2.
94. Bowsher D, Rigge M, Sopp L. Prevalence of chronic pain in the British population: a telephone survey of 1037 households. *Pain Clinic*, 1991;4(4):223-230.
95. Magni G, Caldieron C, Rigatti-Luchini S, Merskey H. Chronic musculoskeletal pain and depressive symptoms in the general population. An analysis of the 1st National Health and Nutrition Examination Survey data. *Pain*. 1990;43(3):299-307. doi:10.1016/0304-3959(90)90027-B.

# Final version of the “Brief Five-item Chronic Pain Questionnaire” in the original language

1. **Lei soffre da almeno 3 mesi di un dolore fisico persistente, in una o più parti del corpo?**

SÌ 1

NO 2

**Se ha risposto NO alla domanda precedente, il questionario finisce qui, Grazie!**

___________________________________________________________________________________

**Se ha risposto SÌ alla domanda precedente, prosegua con le successive domande**:

1. **Quanto è intenso questo dolore fisico persistente?**

Molto lieve 1

Lieve 2

Moderato 3

Forte 4

Molto forte 5

1. **Lei ritiene che questo dolore fisico persistente sia iniziato dopo:**

***(Fornire una sola risposta, indicare l’evento prevalente)***

Un intervento chirurgico 1

Un trauma (da incidente stradale, domestico, sul lavoro o nel tempo

libero) 2

Un tumore 3

Una malattia (inclusi reumatismi, artriti, artrosi, infezioni, ecc.)

diagnosticata da un medico 4

Una malattia non ben definita che non ha ancora ricevuto una diagnosi 5

1. **A causa di questo dolore fisico persistente, Lei ha assunto/assume farmaci o ha effettuato/effettua terapie mediche, fisiatriche, riabilitative, ecc.?**

SÌ, con continuità 1

SÌ, a cicli 2

SÌ, al bisogno 3

NO 4

**Se ha risposto SÌ alla domanda precedente:**

1. **Lei ritiene che questi trattamenti:**

Le permettano di tornare a star bene 1

Le tolgano solo una parte del suo dolore 2

Non abbiano alcun successo 3

# Final version of the “Brief Five-item Chronic Pain Questionnaire”

# English version (not validated)

1. **Have you been suffering from persistent physical pain in one or more parts of your body for at least the last 3 months?**

Yes 1

No 2

**If you answered “NO” to this question, the questionnaire ends here. Thank you!**

___________________________________________________________________________________

**If you answered “YES” to this question, please continue with the following questions**:

1. **How intense do your feel this persistent physical pain?**

Very mild 1

Mild 2

Moderate 3

Severe 4

Very severe 5

1. **Do you believe this persistent physical pain has started after:**

***(Please, provide a single answer, indicating the “prevailing” event)***

A surgical procedure 1

A trauma (a road accidents, or domestic or at work, or in your spare time) 2

A tumor 3

A medically diagnosed disease (including rheumatism, arthritis, osteoarthritis,

infections, etc.) 4

A not-well-defined disease that has not yet received a diagnosis 5

1. **Because of this persistent physical pain, did you take /are you taking medications or did you undergo/are you undergoing any treatments (medical or physiatric or rehabilitative, etc.?)**

YES, continuously 1

YES, in cycles 2

YES, as needed 3

NO 4

**If you answered “YES” to the previous question:**

1. **Do you believe these treatments:**

Allow you to feel good again? 1

Relieve your pain only in part? 2

Have no effect at all 3
